# Supplementary material for: Relationship Between Early Childhood Non-Parental Childcare and Diet, Physical Activity, Sedentary Behaviour, and Sleep: A Systematic Review of Longitudinal Studies
Source: PubMed Central journal article supplement (PMC6926528; doi:10.3390/ijerph16234652), 2019-11-22
Supplement: ijerph-16-04652-s001.pdf [file ijerph-16-04652-s001.pdf]

## SUPPLEMENT 1 – SEARCH STRATEGY EXAMPLES

### Medline via Ovid:

1. childcare.ti,ab.
2. "child care".ti,ab.
3. "family care".ti,ab.
4. "care cent\*".ti,ab.
5. preschool\*.ti,ab.
6. "pre school\*".ti,ab.
7. nurser\*.ti,ab.
8. kindergarten\*.ti,ab.
9. creche\*.ti,ab.
10. childmind\*.ti,ab.
11. nann\*.ti,ab.
12. "au pair\*".ti,ab.
13. "friend care".ti,ab.
14. "neighbor care".ti,ab.
15. "neighbour care".ti,ab.
16. "kith care".ti,ab.
17. "kin care".ti,ab.
18. "play school".ti,ab.
19. "play group".ti,ab.
20. "early years".ti,ab.
21. "age integrated".ti,ab.
22. "grandparent care".ti,ab.
23. or/1-22
24. "body composition".ti,ab.
25. fat\*.ti,ab.
26. adipos\*.ti,ab.
27. lean\*.ti,ab.
28. waist.ti,ab.
29. abdominal.ti,ab.
30. hip.ti,ab.
31. weight.ti,ab.
32. BMI.ti,ab.
33. quetelet.ti,ab.
34. "ponderal index".ti,ab.
35. obes\*.ti,ab.

36. overweight.ti,ab.
37. underweight.ti,ab.
38. thin\*.ti,ab.
39. "skin fold thickness".ti,ab.
40. DEXA.ti,ab.
41. DXA.ti,ab.
42. "dual energy x-ray absorptiometry".ti,ab.
43. impedance.ti,ab.
44. anthropometer\*.ti,ab.
45. or/24-44
46. activ\*.ti,ab.
47. play\*.ti,ab.
48. exercise\*.ti,ab.
49. "motor skill\*".ti,ab.
50. walk\*.ti,ab.
51. "motor development".ti,ab.
52. step\*.ti,ab.
53. sport\*.ti,ab.
54. fitness.ti,ab.
55. "gross motor".ti,ab.
56. game\*.ti,ab.
57. or/46-56
58. sedentar\*.ti,ab.
59. inactiv\*.ti,ab.
60. television.ti,ab.
61. tv.ti,ab.
62. screen\*.ti,ab.
63. computer.ti,ab.
64. "video game\*".ti,ab.
65. "electronic game\*".ti,ab.
66. DVD.ti,ab.
67. internet.ti,ab.
68. or/58-67
69. diet\*.ti,ab.
70. nutrition\*.ti,ab.
71. eat\*.ti,ab.
72. food\*.ti,ab.
73. fruit\*.ti,ab.
74. vegetable\*.ti,ab.
75. water.ti,ab.

76. juice\*.ti,ab.
77. sugar\*.ti,ab.
78. fizzy.ti,ab.
79. drink\*.ti,ab.
80. meal\*.ti,ab.
81. "take away".ti,ab.
82. "energy dense".ti,ab.
83. "high fat".ti,ab.
84. "low fat".ti,ab.
85. "nutrient poor".ti,ab.
86. "empty calor\*".ti,ab.
87. "portion size\*".ti,ab.
88. confectionary.ti,ab.
89. sweet\*.ti,ab.
90. dessert\*.ti,ab.
91. chocolate\*.ti,ab.
92. cake\*.ti,ab.
93. biscuit\*.ti,ab.
94. chip\*.ti,ab.
95. crisp\*.ti,ab.
96. "french fries".ti,ab.
97. snack\*.ti,ab.
98. meat\*.ti,ab.
99. cereal\*.ti,ab.
100. breakfast\*.ti,ab.
101. lunch\*.ti,ab.
102. dinner\*.ti,ab.
103. fried.ti,ab.
104. burger\*.ti,ab.
105. "breastfeed\*".ti,ab.
106. "breast milk".ti,ab.
107. "bottle feed\*".ti,ab.
108. formula.ti,ab.
109. candy.ti,ab.
110. beverage\*.ti,ab.
111. savory.ti,ab.
112. savoury.ti,ab.
113. overeat\*.ti,ab.
114. or/69-113
115. sleep\*.ti,ab.

116. rest\*.ti,ab.
117. nap\*.ti,ab.
118. or/115-117
119. stress\*.ti,ab.
120. cortisol.ti,ab.
121. HPA.ti,ab.
122. "hypothalamic pituitary adrenal".ti,ab.
123. catecholamine\*.ti,ab.
124. ACTH.ti,ab.
125. or/119-124
126. Epidemiologic studies/
127. exp case control studies/
128. exp cohort studies/
129. Case control.tw.
130. (cohort adj (study or studies)).tw.
131. Cohort analy\$.tw.
132. (Follow up adj (study or studies)).tw.
133. (observational adj (study or studies)).tw.
134. Longitudinal.tw.
135. Retrospective.tw.
136. or/126-135
137. 23 and 45 and 136
138. 23 and 57 and 136
139. 23 and 68 and 136
140. 23 and 118 and 136
141. 23 and 125 and 136
142. 23 and 114 and 136
143. limit 137 to humans
144. limit 138 to humans
145. limit 139 to humans
146. limit 140 to humans
147. limit 141 to humans
148. limit 142 to humans

## Embase via Ovid:

1. childcare.ti,ab.
2. "child care".ti,ab.
3. "family care".ti,ab.
4. "care cent\*".ti,ab.
5. preschool\*.ti,ab.
6. "pre school\*".ti,ab.
7. nurser\*.ti,ab.
8. kindergarten\*.ti,ab.
9. creche\*.ti,ab.
10. childmind\*.ti,ab.
11. nann\*.ti,ab.
12. "au pair\*".ti,ab.
13. "friend care".ti,ab.
14. "neighbor care".ti,ab.
15. "neighbour care".ti,ab.
16. "kith care".ti,ab.
17. "kin care".ti,ab.
18. "play school".ti,ab.
19. "play group".ti,ab.
20. "early years".ti,ab.
21. "age integrated".ti,ab.
22. "grandparent care".ti,ab.
23. or/1-22
24. "body composition".ti,ab.
25. fat\*.ti,ab.
26. adipos\*.ti,ab.
27. lean\*.ti,ab.
28. waist.ti,ab.
29. abdominal.ti,ab.
30. hip.ti,ab.
31. weight.ti,ab.
32. BMI.ti,ab.
33. quetelet.ti,ab.
34. "ponderal index".ti,ab.
35. obes\*.ti,ab.
36. overweight.ti,ab.
37. underweight.ti,ab.
38. thin\*.ti,ab.

39. "skin fold thickness".ti,ab.
40. DEXA.ti,ab.
41. DXA.ti,ab.
42. "dual energy x-ray absorptiometry".ti,ab.
43. impedance.ti,ab.
44. anthropometer\*.ti,ab.
45. or/24-44
46. activ\*.ti,ab.
47. play\*.ti,ab.
48. exercise\*.ti,ab.
49. "motor skill\*".ti,ab.
50. "motor development".ti,ab.
51. walk\*.ti,ab.
52. step\*.ti,ab.
53. sport\*.ti,ab.
54. fitness.ti,ab.
55. "gross motor".ti,ab.
56. game\*.ti,ab.
57. or/46-56
58. sedentar\*.ti,ab.
59. inactiv\*.ti,ab.
60. television.ti,ab.
61. tv.ti,ab.
62. screen\*.ti,ab.
63. computer.ti,ab.
64. "video game\*".ti,ab.
65. "electronic game\*".ti,ab.
66. DVD.ti,ab.
67. sit\*.ti,ab.
68. or/58-67
69. diet\*.ti,ab.
70. nutrition\*.ti,ab.
71. eat\*.ti,ab.
72. food\*.ti,ab.
73. fruit\*.ti,ab.
74. vegetable\*.ti,ab.
75. water.ti,ab.
76. juice\*.ti,ab.
77. sugar\*.ti,ab.
78. fizzy.ti,ab.

79. drink\*.ti,ab.
80. meal\*.ti,ab.
81. "take away".ti,ab.
82. "energy dense".ti,ab.
83. "high fat".ti,ab.
84. "low fat".ti,ab.
85. "nutrient poor".ti,ab.
86. "empty calor\*".ti,ab.
87. "portion size\*".ti,ab.
88. confectionary.ti,ab.
89. sweet\*.ti,ab.
90. dessert\*.ti,ab.
91. chocolate\*.ti,ab.
92. cake\*.ti,ab.
93. biscuit\*.ti,ab.
94. chip\*.ti,ab.
95. crisp\*.ti,ab.
96. "french fries".ti,ab.
97. snack\*.ti,ab.
98. meat\*.ti,ab.
99. cereal\*.ti,ab.
100. breakfast\*.ti,ab.
101. lunch\*.ti,ab.
102. dinner\*.ti,ab.
103. fried.ti,ab.
104. burger\*.ti,ab.
105. "breastfeed\*".ti,ab.
106. "breast milk".ti,ab.
107. "bottle feed\*".ti,ab.
108. formula.ti,ab.
109. candy.ti,ab.
110. beverage\*.ti,ab.
111. savoury.ti,ab.
112. savory.ti,ab.
113. overeate\*.ti,ab.
114. or/69-113
115. sleep\*.ti,ab.
116. rest\*.ti,ab.
117. nap\*.ti,ab.
118. or/115-117

119. stress\*.ti,ab.
120. cortisol.ti,ab.
121. HPA.ti,ab.
122. "hypothalamic pituitary adrenal".ti,ab.
123. catecholamine\*.ti,ab.
124. ACTH.ti,ab.
125. or/119-124
126. Clinical study/
127. "Case control study".mp. [mp=title, abstract, heading word, drug trade name, original title, device manufacturer, drug manufacturer, device trade name, keyword]
128. Family study/
129. Longitudinal study/
130. Retrospective study/
131. Prospective study/
132. Randomized controlled trials/
133. 131 not 132
134. Cohort analysis/
135. (Cohort adj (study or studies)).mp.
136. (Case control adj (study or studies)).tw.
137. (follow up adj (study or studies)).tw.
138. (observational adj (study or studies)).tw.
139. (epidemiologic\$ adj (study or studies)).tw.
140. (cross sectional adj (study or studies)).tw.
141. or/126-130,133-140
142. 23 and 45 and 141
143. 23 and 57 and 141
144. 23 and 68 and 141
145. 23 and 114 and 141
146. 23 and 118 and 141
147. 23 and 125 and 141
148. limit 142 to human
149. limit 143 to human
150. limit 144 to human
151. limit 145 to human
152. limit 146 to human
153. limit 147 to human
